# Supplementary material for: ALPL-1 is a target for chimeric antigen receptor therapy in osteosarcoma
Source: PubMed Central journal article supplement (PMC10250459; doi:10.1038/s41467-023-39097-x), 2023-06-08
Supplement: 41467_2023_39097_MOESM1_ESM.pdf [file 41467_2023_39097_MOESM1_ESM.pdf]

1

## SUPPLEMENTARY INFORMATION

### 2 **ALPL-1 is a target for chimeric antigen receptor therapy in osteosarcoma**

3 Nadia Mensali<sup>1</sup>, Hakan Köksal<sup>1,20</sup>, Sandy Joaquina<sup>1,20</sup>, Patrik Wernhoff<sup>1</sup>, Nicholas P. Casey<sup>1</sup>, Paola  
4 Romecin<sup>2,3</sup>, Carla Panisello<sup>2,3</sup>, René Rodriguez<sup>4,5,6</sup>, Lene Vimeux<sup>7</sup>, Asta Juzeniene<sup>8</sup>, Marit R. Myhre<sup>1</sup>,  
5 Anne Fåne<sup>1</sup>, Carolina Castilla Ramírez<sup>9</sup>, Solrun Melkorka Maggadottir<sup>1</sup>, Adil Doganay Duru<sup>10</sup>, Anna-  
6 Maria Georgoudaki<sup>10,11</sup>, Iwona Grad<sup>8</sup>, Andrés Daniel Maturana<sup>12</sup>, Gustav Gaudernack<sup>13</sup>, Gunnar  
7 Kvalheim<sup>1</sup>, Angel M. Carcaboso<sup>14</sup>, Enrique de Alava<sup>9,15</sup>, Emmanuel Donnadieu<sup>7</sup>, Øyvind S. Bruland<sup>16</sup>,  
8 Pablo Menendez<sup>2,3,17,18,19</sup>, Else Marit Inderberg<sup>1, ✉</sup> & Sébastien Wälchli<sup>1, ✉</sup>

9

10

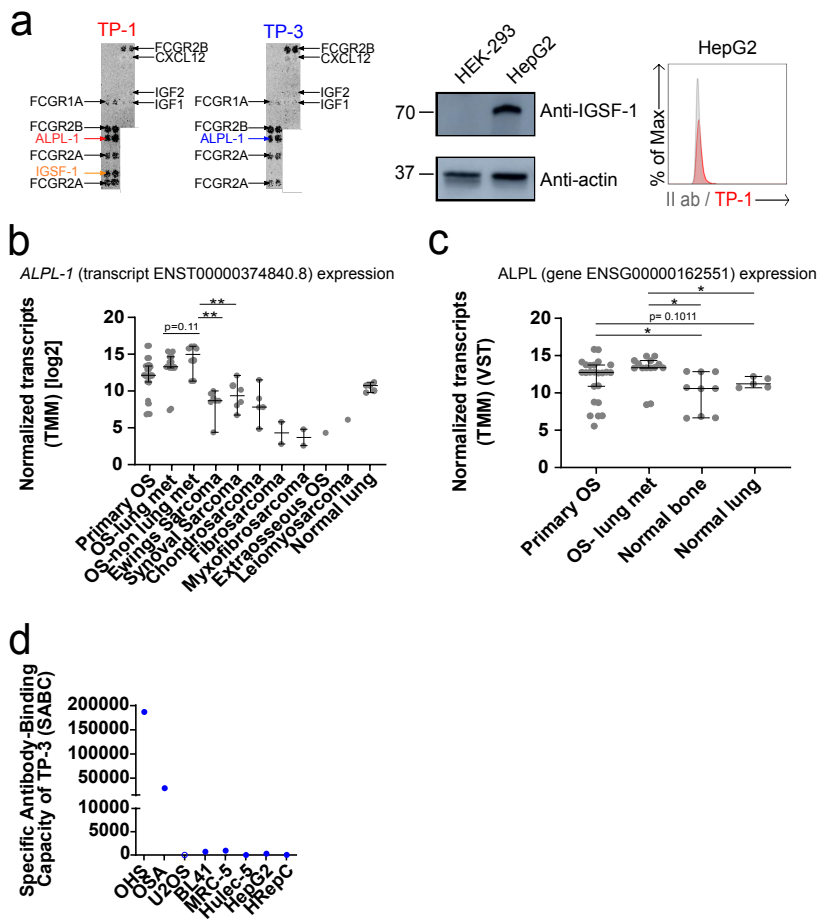

**Supplementary Figure 1. TP antibody specificity and affinity.** **a**, Target identification and cross-reactivity screening of TP-1 and TP-3 antibodies using Retrogenix screening technology (left, was repeated two times); Western blotting showing presence of IGSF-1 proteins in Hep G2 (middle) (n=2, uncropped Western blotting in supplementary information); flow cytometric histograms showing staining of HepG2 with TP-1 antibodies (right). **b**, Expression of ALPL-1 transcript ENST00000374840.8 in sarcomas (Primary OS n= 24, OS-lung metastatic (met) n=14, OS-non lung metastatic n= 8, Ewing Sarcoma n=7, Synovial Sarcoma n=6, Chondrosarcoma n=5, Fibrosarcoma n=2, Myxofibrosarcoma n= 2, Extrasosseous OS n=1, Leiomyosarcoma n=1) and normal lung (n=5), (met, metastasis). The expression data is normalized by Trimmed mean of M values (TMM) method prior to log2 transformation. Statistical comparisons were performed with two-tailed Mann-Whitney test ns, not significant  $p > 0.05$ , \* $p < 0.05$ , \*\* $p < 0.01$ ). **c**, Expression of ALPL gene ENSG00000162551 in primary (n=24) and metastatic (met) OS (n=14) and in normal tissues for bone (n=9) and lung (n=5). Normalized expression data presented using VST (variance stabilizing transformation). Statistical comparisons were performed with two-tailed Mann-Whitney test ns, not significant  $p > 0.05$ , \* $p < 0.05$ ). **b,c**, Data are presented as median with 95% confidence interval. **d**, Specific antibody binding capacity of TP-3 against OS cell lines (OHS, OSA and U2OS), lymphoma (BL-41), healthy tissue cells representing lung (MRC-5, Hulec-5a, HPAEpiC), liver (HH), and kidney (HREpC).

**a**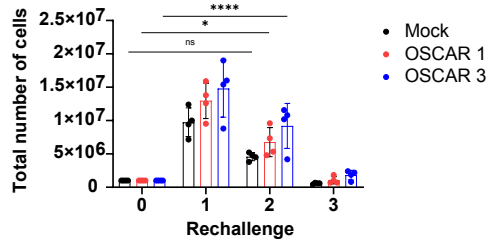**b**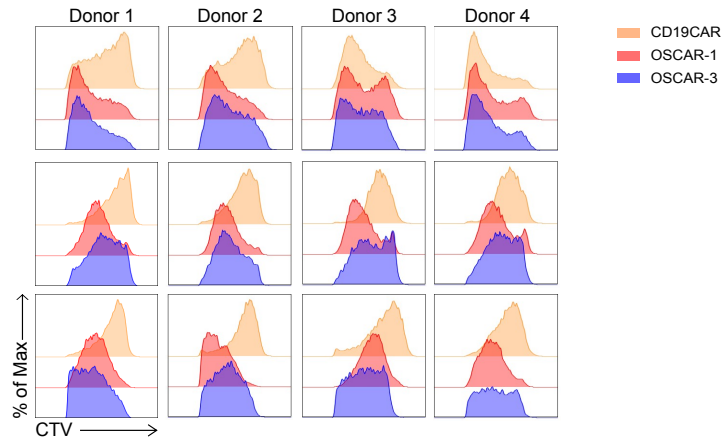**c**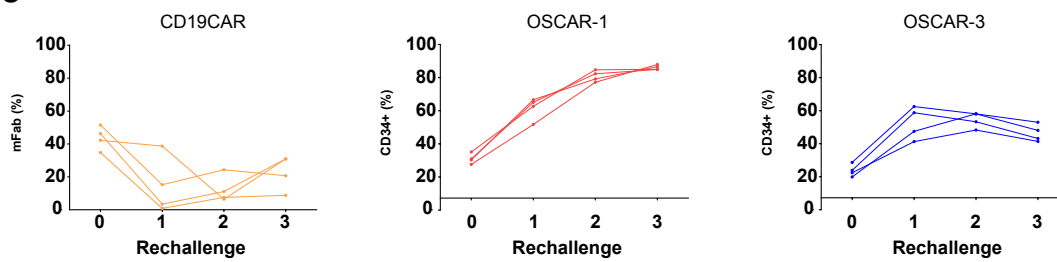

**Supplementary Figure 2. a**, Proliferation capability of OSCAR T cells upon rechallenge with OHS cell line. Data are shown as independent values of four donors ( $n=4$ ). Two-way ANOVA with Tukey's multiple comparison test was used to calculate p values (ns, not significant  $p>0.05$ ,  $*p<0.05$ ,  $****p<0.0001$ ). **b**, Histograms of CTV staining of CAR T cells after 1<sup>st</sup> (top panel), 2<sup>nd</sup> (middle panel) and 3<sup>rd</sup> (bottom panel) antigen stimulation (HEK-293<sup>ALPL-1</sup>). Mean fluorescence intensity (MFI) of CTV in CD19CAR (orange), OSCAR-1 (red) and OSCAR-3 (blue) is shown in four donors. **c**, Monitoring of CAR expression after repeated antigen stimulation with HEK-293<sup>ALPL-1</sup> (three rechallenges). OSCAR-1 and 3 were detected by CD34 staining, and CD19CAR by mFab staining. Data are shown as independent values of four donors ( $n=4$ ).

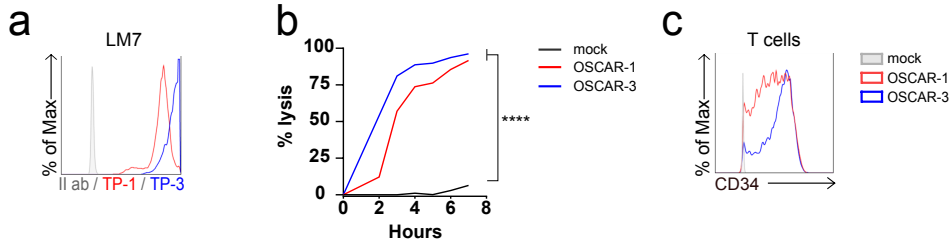

**Supplementary Figure 3. *In vitro* effector function of OSCAR -1 and OSCAR -3 T cells towards LM7 OS cells. a,** Representative flow cytometric histograms showing staining of LM7 OS cells with TP-1 and TP-3 antibodies. **b,** Kinetics of *in vitro* cytotoxicity of OSCAR-1 and OSCAR-3 T cells against LM7 cells at an E:T ratio of 10:1 (in red and blue). Lysis of LM7 cells is monitored up to 7 hours. Data represents mean  $\pm$  s.d. of two independent experiments (n=2). Statistical comparisons are performed with two-way ANOVA with Tukey's multiple comparison test (ns, not significant  $p > 0.05$ , \*\*\*  $p < 0.0001$ ). **c,** Expression level of OSCAR-1 and OSCAR-3 CAR in T cells used in the cytotoxicity assay.

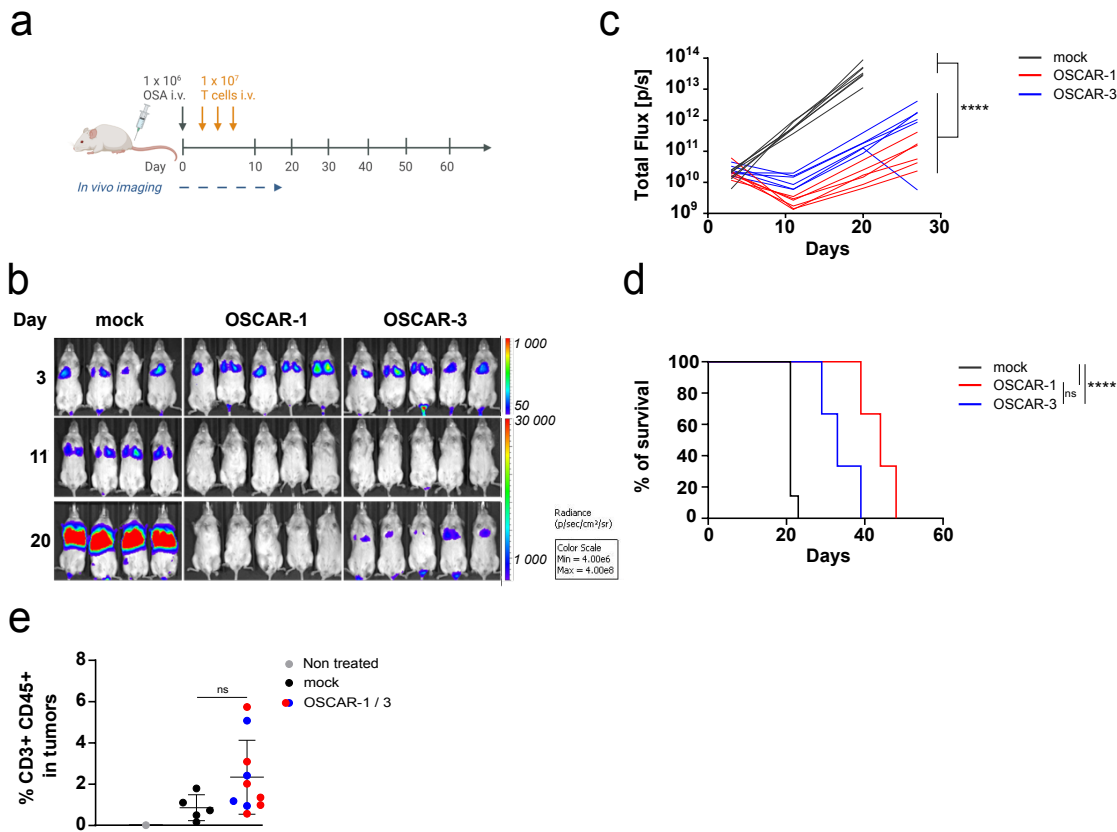

**Supplementary Figure 4. *In vivo* effector function of OSCAR-1 and OSCAR-3 T cells in lung metastatic mouse models. a,** Experimental overview of OSA OS lung model. NSG mice were engrafted with GFP/Luc<sup>+</sup> OSA cells i.v. On day 10, mice were randomized and received 3 i.v. injections of mock, OSCAR-1, or OSCAR-3 T cells. **b,** Tumor burden measured by IVIS. Representative BLI images of the luminescent signal from each treatment group. **c,** Quantification of tumor progression for each individual mouse per each group measured by flux values acquired via BLI. Statistical comparisons were performed with two-way ANOVA with Tukey's multiple comparison test (ns, not significant \*\*\*\*p<0.0001). **d,** Kaplan-Meier survival curves using a Mantel-Cox (log-rank) test (ns, not significant p>0.05, \*\*\*\*p<0.0001). Experiment was performed once; five mice per group were included (n=5). **e,** T cell homing experiment showing percentage of CD3<sup>+</sup>/CD45<sup>+</sup> cells found in tumor tissues from lungs. 3 mice per treatment group were injected i.v. with 1 x 10<sup>6</sup> GFP/Luc<sup>+</sup> OSA cells. Tumor-bearing mice were randomized and injected once with 1 x 10<sup>7</sup> mock, OSCAR-1, or OSCAR-3 T cells. Mice were euthanized 4 days after T cell injection and lungs were dissected. Data are presented as mean ± s.d. Statistical comparisons were performed with two-tailed unpaired Student t-test (ns, not significant p= 0.1849).

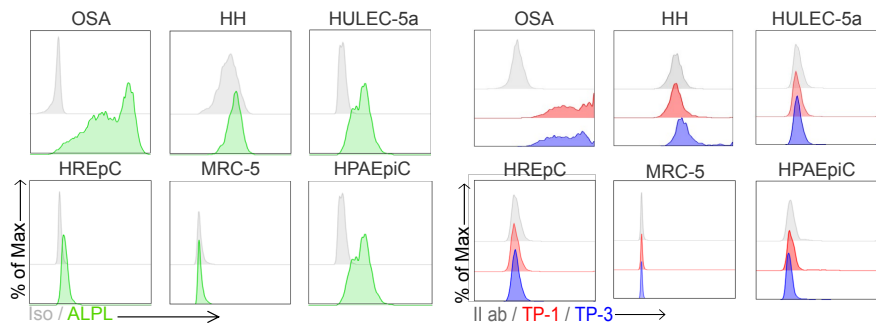

**Supplementary Figure. 5** Staining of target cells in figure 5b with anti ALPL, TP-1 and TP-3 antibodies.

Isotype and secondary antibody controls (grey).

| Sample Id   | Type                                      | Sample Alias | Condition | Source |
|-------------|-------------------------------------------|--------------|-----------|--------|
| 10_S1       | Synovial sarcoma                          | HTT10        | Tumor     | NSUC   |
| 12_S2       | Extraosseous                              | HTT12        | Tumor     | NSUC   |
| 16_S3       | osteosarcoma<br>Pleomorphic               | HTT16        | Tumor     | NSUC   |
| 17_S4       | myxofibrosarcoma<br>Primary OS            | HTT17        | Tumor     | NSUC   |
| 21_S5       | Myxofibrosarcoma                          | HTT21        | Tumor     | NSUC   |
| 25_S6       | Pleomorphic spindle<br>cell sarcoma       | HTT25        | Tumor     | NSUC   |
| 26_S7       | Chondrosarcoma                            | HTT26        | Tumor     | NSUC   |
| 29_S8       | Chondrosarcoma                            | HTT29        | Tumor     | NSUC   |
| 30_S1       | Chondrosarcoma                            | HTT30        | Tumor     | NSUC   |
| 31_S2       | High grade<br>pleomorphic<br>fibrosarcoma | HTT31        | Tumor     | NSUC   |
| 38_S3       | ST_sarcoma                                | HTT38        | Tumor     | NSUC   |
| 39_S4       | Primary OS                                | HTT39        | Tumor     | NSUC   |
| 41_S5       | Fibrosarcoma                              | HTT41        | Tumor     | NSUC   |
| 42_S6       | Fibrosarcoma                              | HTT42        | Tumor     | NSUC   |
| 47_S7       | Ewings sarcoma                            | HTT47        | Tumor     | NSUC   |
| 52_S8       | Myxofibrosarcoma                          | HTT52        | Tumor     | NSUC   |
| 58_S1       | Leiomyosarcoma                            | HTT58        | Tumor     | NSUC   |
| 62_S2       | Chondrosarcoma                            | HTT62        | Tumor     | NSUC   |
| 74_S3       | n.d                                       | HTT74        | Tumor     | NSUC   |
| 75_S4       | n.d                                       | HTT75        | Tumor     | NSUC   |
| 78_S5       | Primary OS                                | HTT78        | Tumor     | NSUC   |
| 79_S6       | Chondrosarcoma                            | HTT79        | Tumor     | NSUC   |
| 82_S7       | Primary OS                                | HTT82        | Tumor     | NSUC   |
| SRR10691631 | Normal kidney                             | GSM4217781   | Normal    | ENA    |
| SRR10691632 | Normal kidney                             | GSM4217782   | Normal    | ENA    |
| SRR10691633 | Normal kidney                             | GSM4217783   | Normal    | ENA    |
| SRR10691634 | Normal kidney                             | GSM4217784   | Normal    | ENA    |
| SRR10691635 | Normal kidney                             | GSM4217785   | Normal    | ENA    |
| SRR11804653 | Ewings sarcoma                            | GSM4557259   | Tumor     | ENA    |
| SRR11804654 | Ewings sarcoma                            | GSM4557260   | Tumor     | ENA    |
| SRR11804655 | Ewings sarcoma                            | GSM4557261   | Tumor     | ENA    |
| SRR11804656 | Ewings sarcoma                            | GSM4557262   | Tumor     | ENA    |
| SRR11804657 | Ewings sarcoma                            | GSM4557263   | Tumor     | ENA    |
| SRR11804658 | Ewings sarcoma                            | GSM4557264   | Tumor     | ENA    |
| SRR1265495  | Normal lung                               | GSM1375986   | Normal    | ENA    |
| SRR1265496  | Normal lung                               | GSM1375987   | Normal    | ENA    |
| SRR1265497  | Normal lung                               | GSM1375988   | Normal    | ENA    |
| SRR1265498  | Normal lung                               | GSM1375989   | Normal    | ENA    |
| SRR1265499  | Normal lung                               | GSM1375990   | Normal    | ENA    |
| SRR2748125  | Highly-met OS cell line                   | GSM1915018   | Tumor     | ENA    |
| SRR2748126  | Highly-met OS cell line                   | GSM1915019   | Tumor     | ENA    |
| SRR2748127  | Highly-met OS cell line                   | GSM1915020   | Tumor     | ENA    |
| SRR2748128  | Highly-met OS cell line                   | GSM1915021   | Tumor     | ENA    |
| SRR2748129  | Highly-met OS cell line                   | GSM1915022   | Tumor     | ENA    |
| SRR2748130  | Non-met OS cell line                      | GSM1915023   | Tumor     | ENA    |
| SRR2748131  | Non-met OS cell line                      | GSM1915024   | Tumor     | ENA    |
| SRR2748132  | Highly-met OS cell line                   | GSM1915025   | Tumor     | ENA    |
| SRR4343885  | OS-lung met                               | HO002M       | Tumor     | ENA    |
| SRR4343886  | OS-lung met                               | HO002M       | Tumor     | ENA    |
| SRR4343887  | OS-lung met                               | HO002M       | Tumor     | ENA    |
| SRR4343888  | OS-lung met                               | HO002M       | Tumor     | ENA    |
| SRR4343889  | OS-lung met                               | HO002M       | Tumor     | ENA    |
| SRR4343890  | OS-lung met                               | HO002M       | Tumor     | ENA    |
| SRR4343891  | Primary OS                                | HO003        | Tumor     | ENA    |
| SRR4343892  | Primary OS                                | HO003        | Tumor     | ENA    |
| SRR4343893  | Primary OS                                | HO003        | Tumor     | ENA    |
| SRR4343894  | Primary OS                                | HO003        | Tumor     | ENA    |
| SRR4343895  | Primary OS                                | HO003        | Tumor     | ENA    |

| Sample Id       | Type             | Sample Alias     | Condition | Source |
|-----------------|------------------|------------------|-----------|--------|
| SRR4343896      | Primary OS       | HO003            | Tumor     | ENA    |
| SRR4343897      | Primary OS       | HO004            | Tumor     | ENA    |
| SRR4343898      | Primary OS       | HO004            | Tumor     | ENA    |
| SRR4343899      | Primary OS       | HO004            | Tumor     | ENA    |
| SRR4343900      | Primary OS       | HO004            | Tumor     | ENA    |
| SRR4344033      | OS-lung met      | HO043M           | Tumor     | ENA    |
| SRR4344034      | OS-lung met      | HO043M           | Tumor     | ENA    |
| SRR4344035      | OS-lung met      | HO044M           | Tumor     | ENA    |
| SRR4344036      | OS-lung met      | HO044M           | Tumor     | ENA    |
| SRR4344039      | OS-met           | HO046M-ch        | Tumor     | ENA    |
| SRR4344040      | OS-met           | HO046M-ch        | Tumor     | ENA    |
| SRR4344041      | OS-met           | HO047M-ch        | Tumor     | ENA    |
| SRR4344042      | OS-met           | HO047M-ch        | Tumor     | ENA    |
| SRR4344043      | OS-lung met      | HO052M           | Tumor     | ENA    |
| SRR4344044      | OS-lung met      | HO052M           | Tumor     | ENA    |
| SRR4344045      | OS-met           | HO055-ch         | Tumor     | ENA    |
| SRR4344046      | OS-met           | HO055-ch         | Tumor     | ENA    |
| SRR4344047      | OS-met           | HO056M-U         | Tumor     | ENA    |
| SRR4344048      | OS-met           | HO056M-U         | Tumor     | ENA    |
| SRR4344049      | Primary OS       | HO057            | Tumor     | ENA    |
| SRR4344050      | Primary OS       | HO057            | Tumor     | ENA    |
| SRR4344051      | OS-lung met      | HO058M           | Tumor     | ENA    |
| SRR4344052      | OS-lung met      | HO058M           | Tumor     | ENA    |
| SRR4344053      | Primary OS       | HO059            | Tumor     | ENA    |
| SRR4344054      | Primary OS       | HO059            | Tumor     | ENA    |
| SRR4344055      | Primary OS       | HO060            | Tumor     | ENA    |
| SRR4344056      | Primary OS       | HO060            | Tumor     | ENA    |
| SRR4344057      | Primary OS       | HO062            | Tumor     | ENA    |
| SRR4344058      | Primary OS       | HO062            | Tumor     | ENA    |
| SRR4344059      | Primary OS       | HO063            | Tumor     | ENA    |
| SRR4344060      | Primary OS       | HO063            | Tumor     | ENA    |
| SRR4344073      | Normal bone      | HO069B           | Normal    | ENA    |
| SRR4344074      | Normal bone      | HO069B           | Normal    | ENA    |
| SRR4344075      | Normal bone      | HO069B           | Normal    | ENA    |
| SRR4344076      | Normal bone      | HO070B           | Normal    | ENA    |
| SRR4344077      | Normal bone      | HO070B           | Normal    | ENA    |
| SRR4344078      | Normal bone      | HO070B           | Normal    | ENA    |
| SRR4344079      | Normal bone      | HO071B           | Normal    | ENA    |
| SRR4344080      | Normal bone      | HO071B           | Normal    | ENA    |
| SRR4344081      | Normal bone      | HO071B           | Normal    | ENA    |
| SRR5576263      | Normal liver     | hiPSC-hepatocyte | Normal    | ENA    |
| SRR5576264      | Normal liver     | HepaRGTM         | Normal    | ENA    |
| SRR5576266      | Normal liver     | hESC-hepatocyte  | Normal    | ENA    |
| SRR6373111      | Synovial sarcoma | GSM2887701       | Tumor     | ENA    |
| SRR6373112      | Synovial sarcoma | GSM2887702       | Tumor     | ENA    |
| SRR6373113      | Synovial sarcoma | GSM2887703       | Tumor     | ENA    |
| SRR6373114      | Synovial sarcoma | GSM2887704       | Tumor     | ENA    |
| SRR6373115      | Synovial sarcoma | GSM2887705       | Tumor     | ENA    |
| SRR6373116      | Synovial sarcoma | GSM2887706       | Tumor     | ENA    |
| Undetermined_S0 | n.d              | n.d              | Tumor     | NSUC   |

**Supplementary Table 1**



| Sample Id  | Type        | Sample Name | Condition | Source |
|------------|-------------|-------------|-----------|--------|
| 17_S4      | Primary OS  | HTT17       | Tumor     | NSUC   |
| 39_S4      | Primary OS  | HTT39       | Tumor     | NSUC   |
| 78_S5      | Primary OS  | HTT78       | Tumor     | NSUC   |
| 82_S7      | Primary OS  | HTT82       | Tumor     | NSUC   |
| SRR1265495 | Normal lung | GSM1375986  | Normal    | ENA    |
| SRR1265496 | Normal lung | GSM1375987  | Normal    | ENA    |
| SRR1265497 | Normal lung | GSM1375988  | Normal    | ENA    |
| SRR1265498 | Normal lung | GSM1375989  | Normal    | ENA    |
| SRR1265499 | Normal lung | GSM1375990  | Normal    | ENA    |
| SRR4343885 | OS-lung met | HO002M      | Tumor     | ENA    |
| SRR4343886 | OS-lung met | HO002M      | Tumor     | ENA    |
| SRR4343887 | OS-lung met | HO002M      | Tumor     | ENA    |
| SRR4343888 | OS-lung met | HO002M      | Tumor     | ENA    |
| SRR4343889 | OS-lung met | HO002M      | Tumor     | ENA    |
| SRR4343890 | OS-lung met | HO002M      | Tumor     | ENA    |
| SRR4343891 | Primary OS  | HO003       | Tumor     | ENA    |
| SRR4343892 | Primary OS  | HO003       | Tumor     | ENA    |
| SRR4343893 | Primary OS  | HO003       | Tumor     | ENA    |
| SRR4343894 | Primary OS  | HO003       | Tumor     | ENA    |
| SRR4343895 | Primary OS  | HO003       | Tumor     | ENA    |
| SRR4343896 | Primary OS  | HO003       | Tumor     | ENA    |
| SRR4343897 | Primary OS  | HO004       | Tumor     | ENA    |
| SRR4343898 | Primary OS  | HO004       | Tumor     | ENA    |
| SRR4343899 | Primary OS  | HO004       | Tumor     | ENA    |
| SRR4343900 | Primary OS  | HO004       | Tumor     | ENA    |
| SRR4344033 | OS-lung met | HO043M      | Tumor     | ENA    |
| SRR4344034 | OS-lung met | HO043M      | Tumor     | ENA    |
| SRR4344035 | OS-lung met | HO044M      | Tumor     | ENA    |
| SRR4344036 | OS-lung met | HO044M      | Tumor     | ENA    |
| SRR4344043 | OS-lung met | HO052M      | Tumor     | ENA    |
| SRR4344044 | OS-lung met | HO052M      | Tumor     | ENA    |
| SRR4344049 | Primary OS  | HO057       | Tumor     | ENA    |
| SRR4344050 | Primary OS  | HO057       | Tumor     | ENA    |
| SRR4344051 | OS-lung met | HO058M      | Tumor     | ENA    |
| SRR4344052 | OS-lung met | HO058M      | Tumor     | ENA    |
| SRR4344053 | Primary OS  | HO059       | Tumor     | ENA    |
| SRR4344054 | Primary OS  | HO059       | Tumor     | ENA    |
| SRR4344055 | Primary OS  | HO060       | Tumor     | ENA    |
| SRR4344056 | Primary OS  | HO060       | Tumor     | ENA    |
| SRR4344057 | Primary OS  | HO062       | Tumor     | ENA    |
| SRR4344058 | Primary OS  | HO062       | Tumor     | ENA    |
| SRR4344059 | Primary OS  | HO063       | Tumor     | ENA    |
| SRR4344060 | Primary OS  | HO063       | Tumor     | ENA    |
| SRR4344073 | Normal bone | HO069B      | Normal    | ENA    |
| SRR4344074 | Normal bone | HO069B      | Normal    | ENA    |
| SRR4344075 | Normal bone | HO069B      | Normal    | ENA    |
| SRR4344076 | Normal bone | HO070B      | Normal    | ENA    |
| SRR4344077 | Normal bone | HO070B      | Normal    | ENA    |
| SRR4344078 | Normal bone | HO070B      | Normal    | ENA    |
| SRR4344079 | Normal bone | HO071B      | Normal    | ENA    |
| SRR4344080 | Normal bone | HO071B      | Normal    | ENA    |
| SRR4344081 | Normal bone | HO071B      | Normal    | ENA    |

Note:

n.d = Not determined, NSUC = Nova Southeastern University Center, ENA = European Nucleotide Archive.

## Supplementary Table 1

## **SUPPLEMENTARY METHODS**

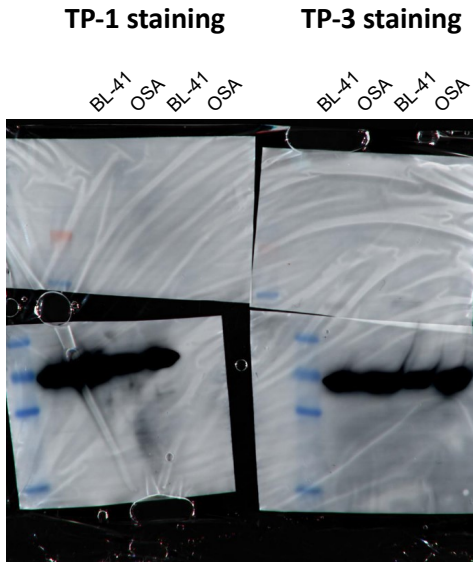

**Supplementary methods 1.** Western Blotting of BL-41 and OSA cells showing that TP-1 and TP-3 antibodies do not bind ALPL. The first column corresponds to the ladder, following by BL-41, OSA, BL-41, OSA (different lysate preparation or similar). Top gels correspond to TPs antibodies incubated and bottom gels correspond to B-actin staining.

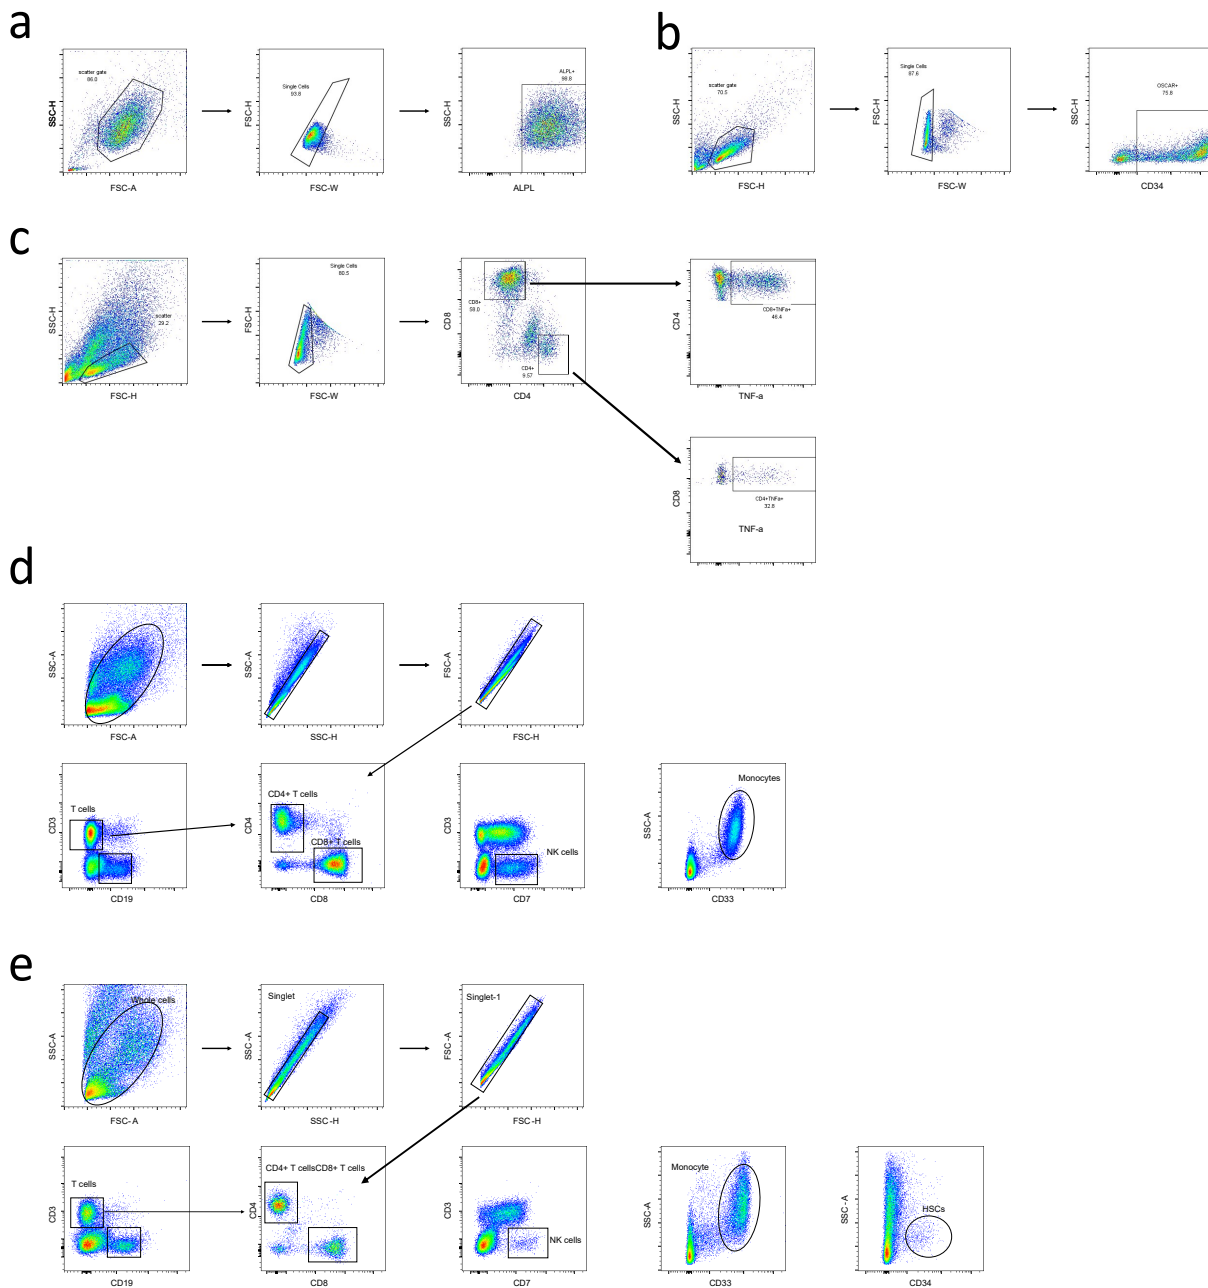

**Supplementary methods 2. Gating strategy.** **a**, Gating strategies used for TPs and ALPL detection in OS cell lines (data shown in Fig. 1a,b,d,f and Fig. 5c). Cells were gated based on size and granularity ( FSC vs SSC). Singlets were gated by FSC-W vs FSC-H and TPs and ALPL were evaluated by the gating SSC vs ALPL/TPs. **b**, Gating strategies used to detect OSCAR+ T cells either by CD34 and/or aFab antibody staining (data shown in Fig. 2a). Cells were gated based on size and granularity (FSC vs SSC). Singlets were gated by FSC-W vs FSC-H and CD34 and/or aFab were evaluated by the gating SSC vs CD34 or SSC vs aFab. **c**, Gating strategies used to detect TNF $\alpha$ + OSCAR CD8+ or CD4+ T cells (data shown in Fig. 5a, b). Cells were gated based on size and granularity (FSC vs SSC). Singlets were gated by FSC-W vs FSC-H. CD8+ or CD4+ T cells were evaluated by the gating CD4 vs CD8 and TNF $\alpha$ + were obtained by the gating CD4 vs TNF $\alpha$  and CD8 vs TNF $\alpha$ . **d**, Gating strategies used TP3/ALPL detection in PBMCs (data shown in Fig. 5c). **e**, Gating strategies used TP3/ALPL detection in bone marrow, BM (data shown in Fig. 5c). For **d and e**, cells were gated based on size and granularity ( FSC vs SSC). Singlets were gated by SSC-H vs SSC-A, and singlet-1 by FSC-H vs FSC-A. T cells and B cells were evaluated by the gating CD3 vs CD19. CD8+ or CD4+ T cells were evaluated by the gating CD4 vs CD8, NK cells were gating on CD7+ CD3-, Monocytes on CD33+ and Human Stem cells (HSCs) CD34+.
