# Supplementary material for: ALPL-1 is a target for chimeric antigen receptor therapy in osteosarcoma
Source: PubMed Central journal article supplement (PMC10250459; doi:10.1038/s41467-023-39097-x), 2023-06-08
Supplement: 41467_2023_39097_MOESM3_ESM.pdf [file 41467_2023_39097_MOESM3_ESM.pdf]

## **Description of Additional Supplementary Files**

File Name: Supplementary Movie 1-3

Description: Movies of time-lapsed video showing Ca<sup>2+</sup> increases in mock T (Data1), OSCAR-1 (Data 2) and OSCAR-3 (Data 3) cells after interaction with OSA tumor cells. OSA cells were seeded on Ibidi  $\mu$ -slide the day before the experiment. CAR T cells loaded with Fura 2-AM were added before image recording. Images were acquired every 20 seconds for 80 cycles. CAR T cell Ca<sup>2+</sup> level is color-coded, ranging from blue to red. Scale bar, 50  $\mu$ m.
